# Supplementary material
Source: Springer Nature journal article supplement (https://www.springermedizin.de/resource/supplementary/13075_2009_2776_MOESM4_ESM.pdf/9692864)

A

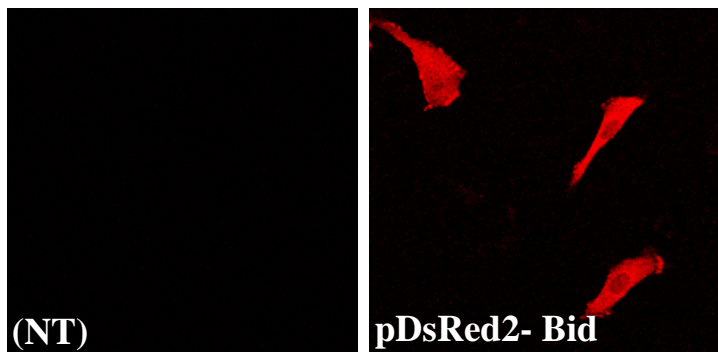

B

pDsRed2-Bid →

Bid →

Actin →

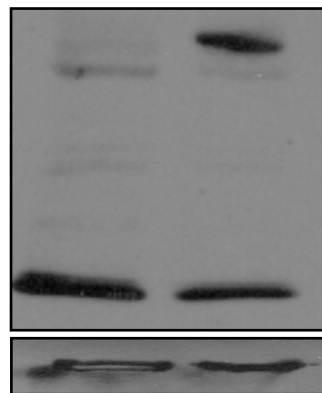

NT pDsRed2-Bid

C

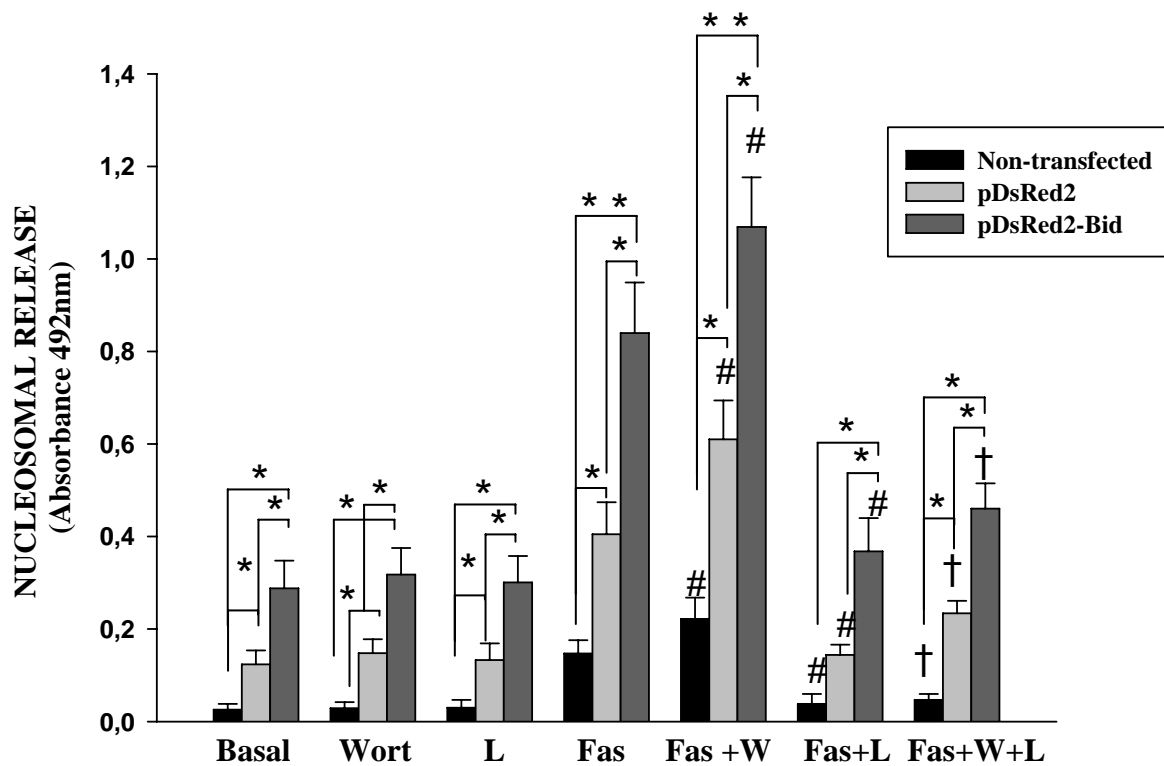

Supplement: MOESM4 [file 9692864]
